# Supplementary material
Source: Springer Nature journal article supplement (https://www.springermedizin.de/resource/supplementary/12907_2010_81_MOESM4_ESM.pdf/9524620)

**a**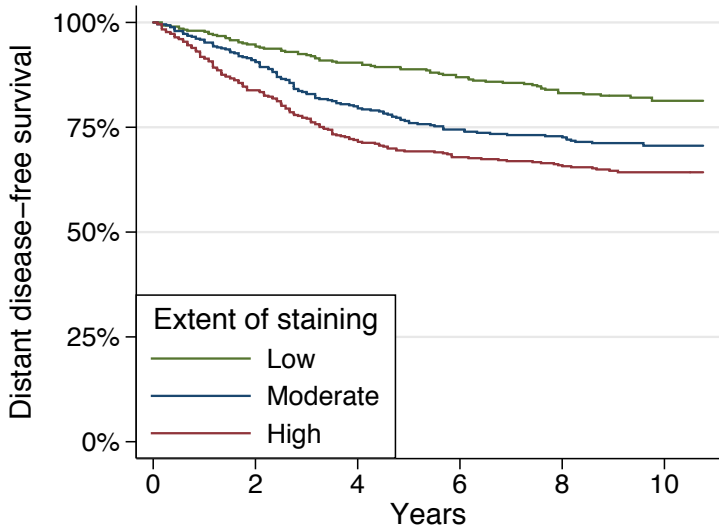**b**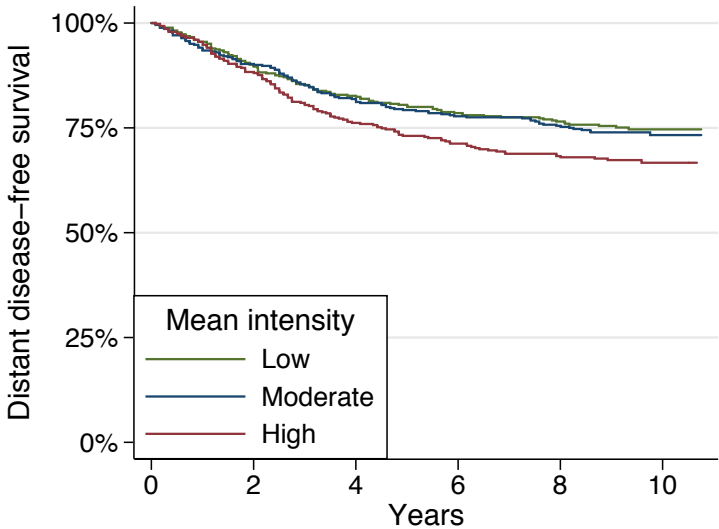

Supplement: MOESM4 [file 9524620]
